# Supplementary material
Source: HighWire-hosted journal article supplement (https://ebm.bmj.com/content/28/6/372)
Supplement: inline-supplementary-material-1 [file inline-supplementary-material-1.pdf]

## Supplementary Appendix

We used the search terms to search the MEDLINE via PubMed (1 Jan 2010 to 30 June 2021) as follows:

#1 "neoplasms"[MeSH Terms] OR "cancer\*"[Title/Abstract] OR "carcinoma\*"[Title/Abstract] OR "oncol\*"[Title/Abstract] OR "tumor\*"[Title/Abstract] OR "tumour\*"[Title/Abstract] OR "adenocarcinoma\*"[Title/Abstract] NOT Leukemia[MeSH Terms] NOT Lymphoma[MeSH Terms] NOT "Multiple Myeloma" [MeSH Terms]

#2 "random\*"[Title/Abstract]

#3 "Antineoplastic Agents"[MeSH Terms] OR "immunotherapy"[All Fields] OR "Immune Checkpoint Inhibitors"[All Fields] OR "target therapy"[All Fields] OR "hormone"[All Fields] OR "chemotherapy"[All Fields]

#4 "humans"[MeSH Terms]

#5 "english"[Language]

#6 randomizedcontrolledtrial[Filter]

#7 2010/01/01:2021/06/30[Date - Publication]

#8 adjuvant[Title] OR neoadjuvant[Title]

#9 "placebo"[Title] OR "blind"[Title]

#1 AND #2 AND #3 AND #4 AND #5 AND #6 AND #7 NOT #8 NOT #9

**Supplementary Figure 2. The trend in PFS adjudicators from 2010 to 2021**

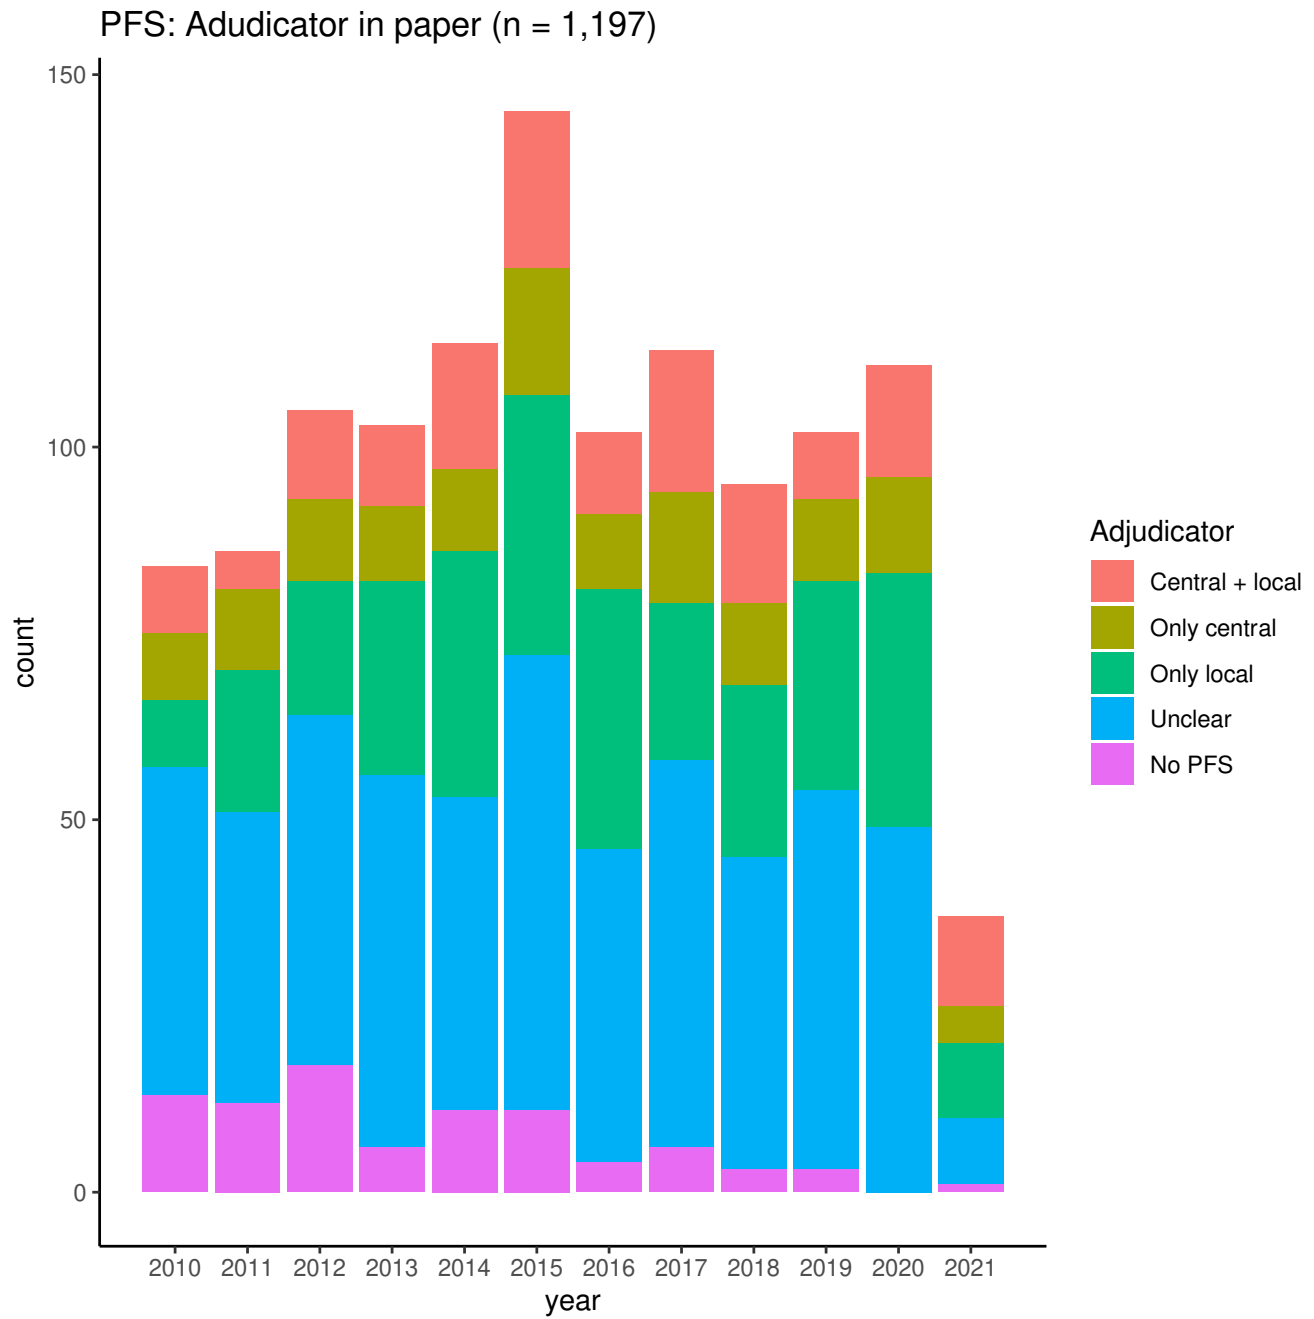

**Supplementary Figure 3. The trend in ORR adjudicators from 2010 to 2021**

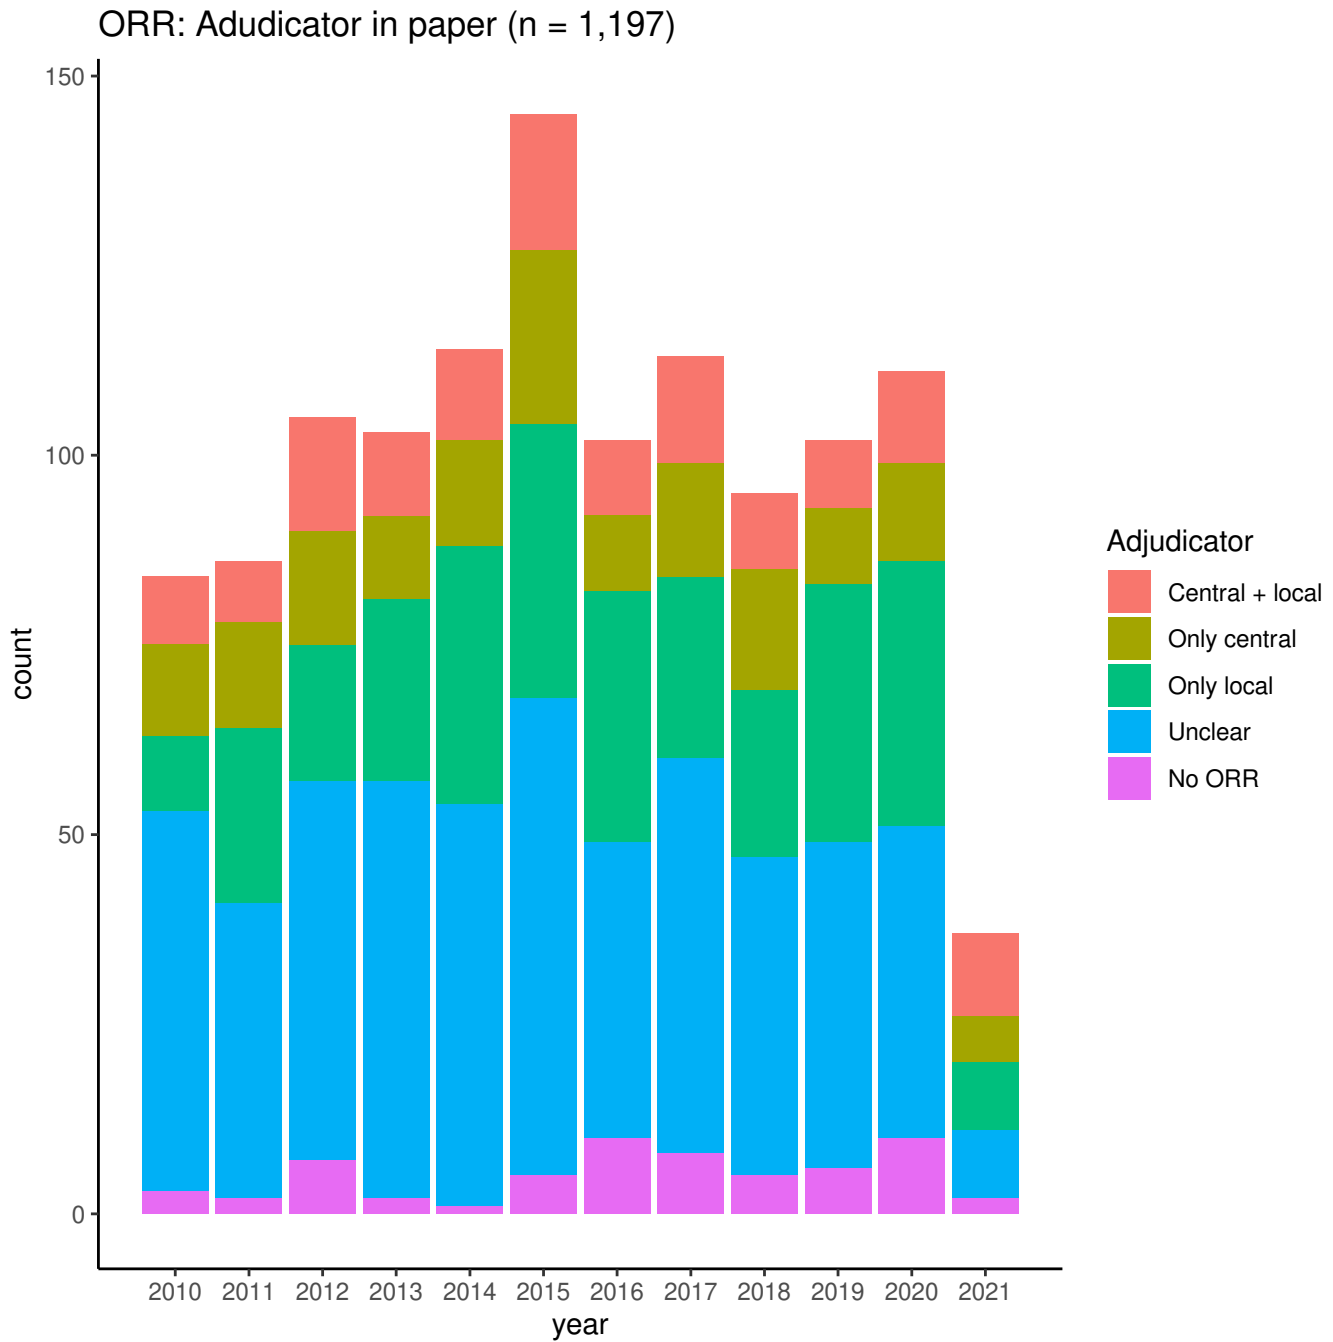

**Supplementary Figure 4a. Comparison of treatment effect estimates (Hazard Ratio) between central reviewers and local investigators. Sensitivity analysis ( $\rho = 0.25$ ).**

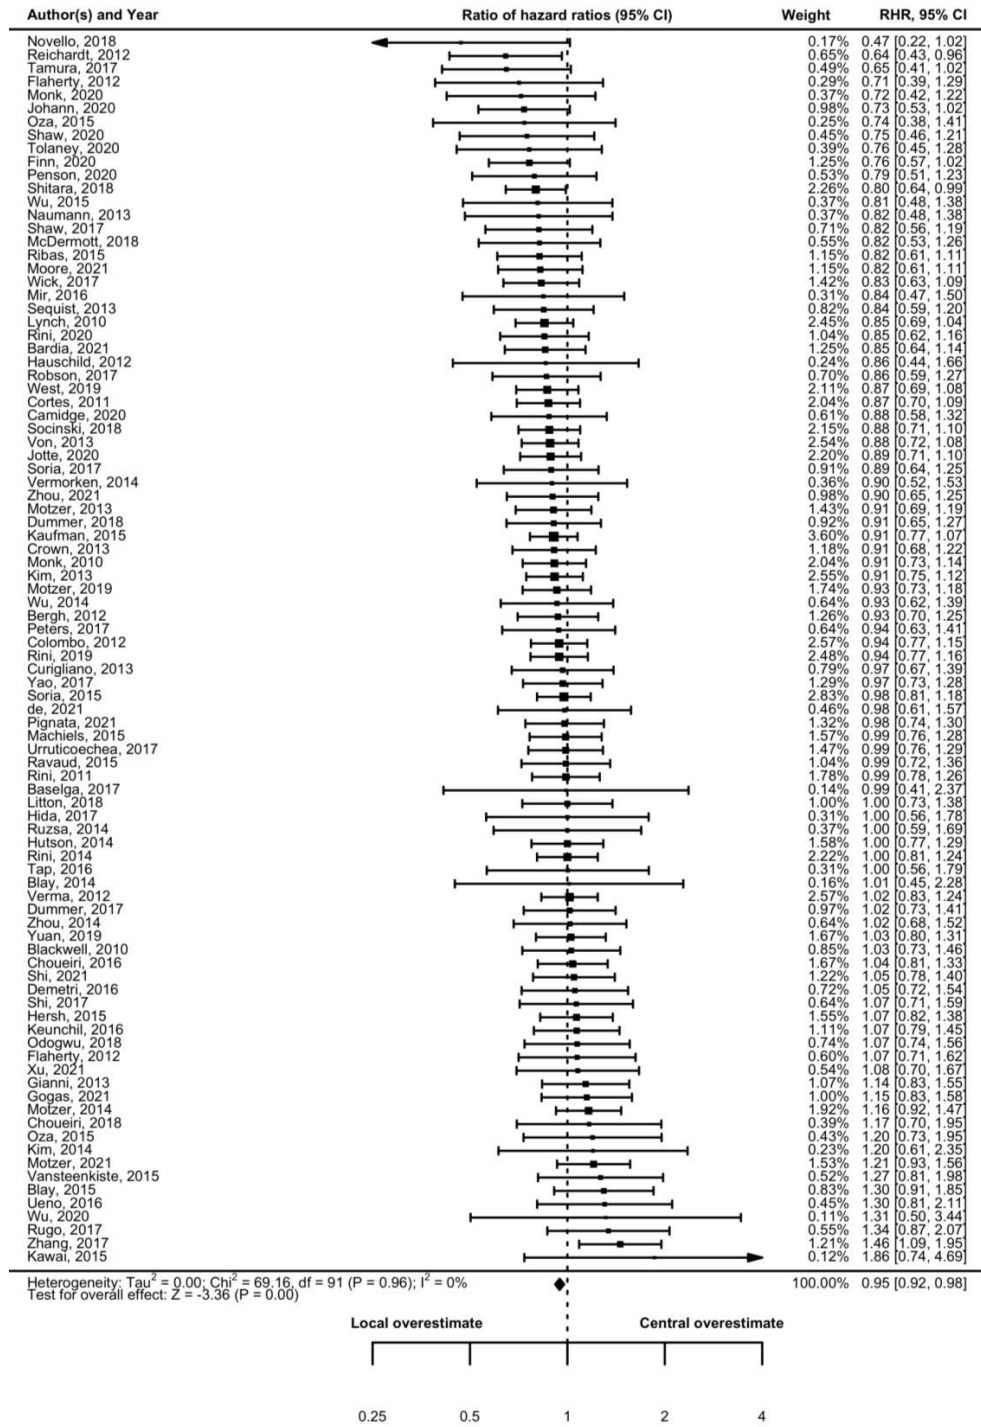

**Supplementary Figure 4b. Comparison of treatment effect estimates (Hazard Ratio) between central reviewers and local investigators. Sensitivity analysis ( $\rho = 0.50$ ).**

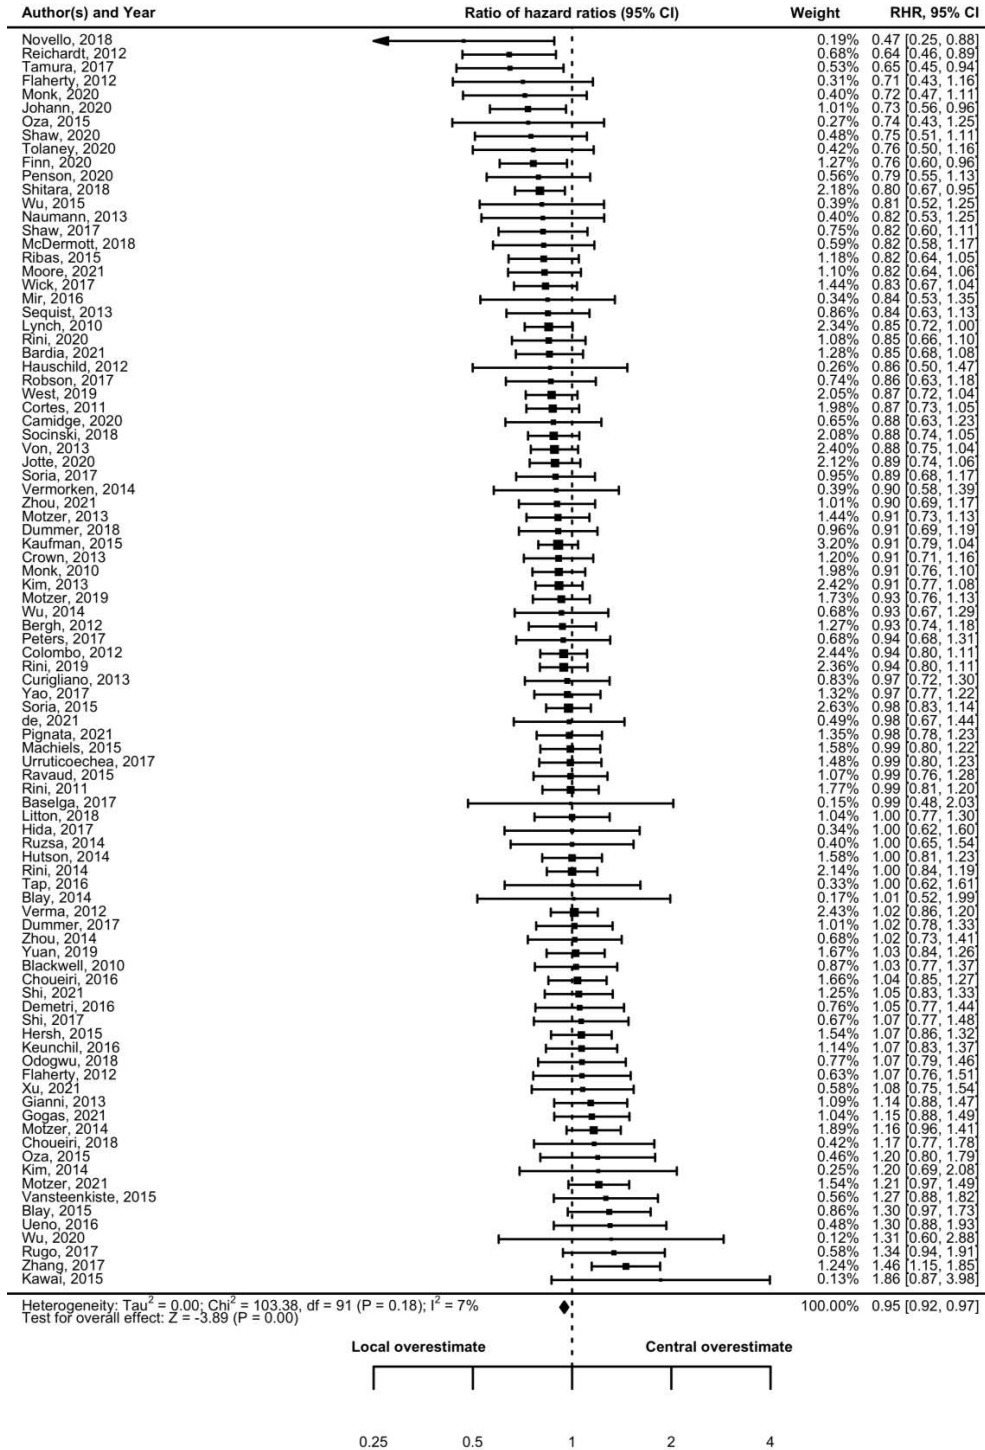

**Supplementary Figure 4c. Comparison of treatment effect estimates (Hazard Ratio) between central reviewers and local investigators. Sensitivity analysis ( $\rho = 0.75$ ).**

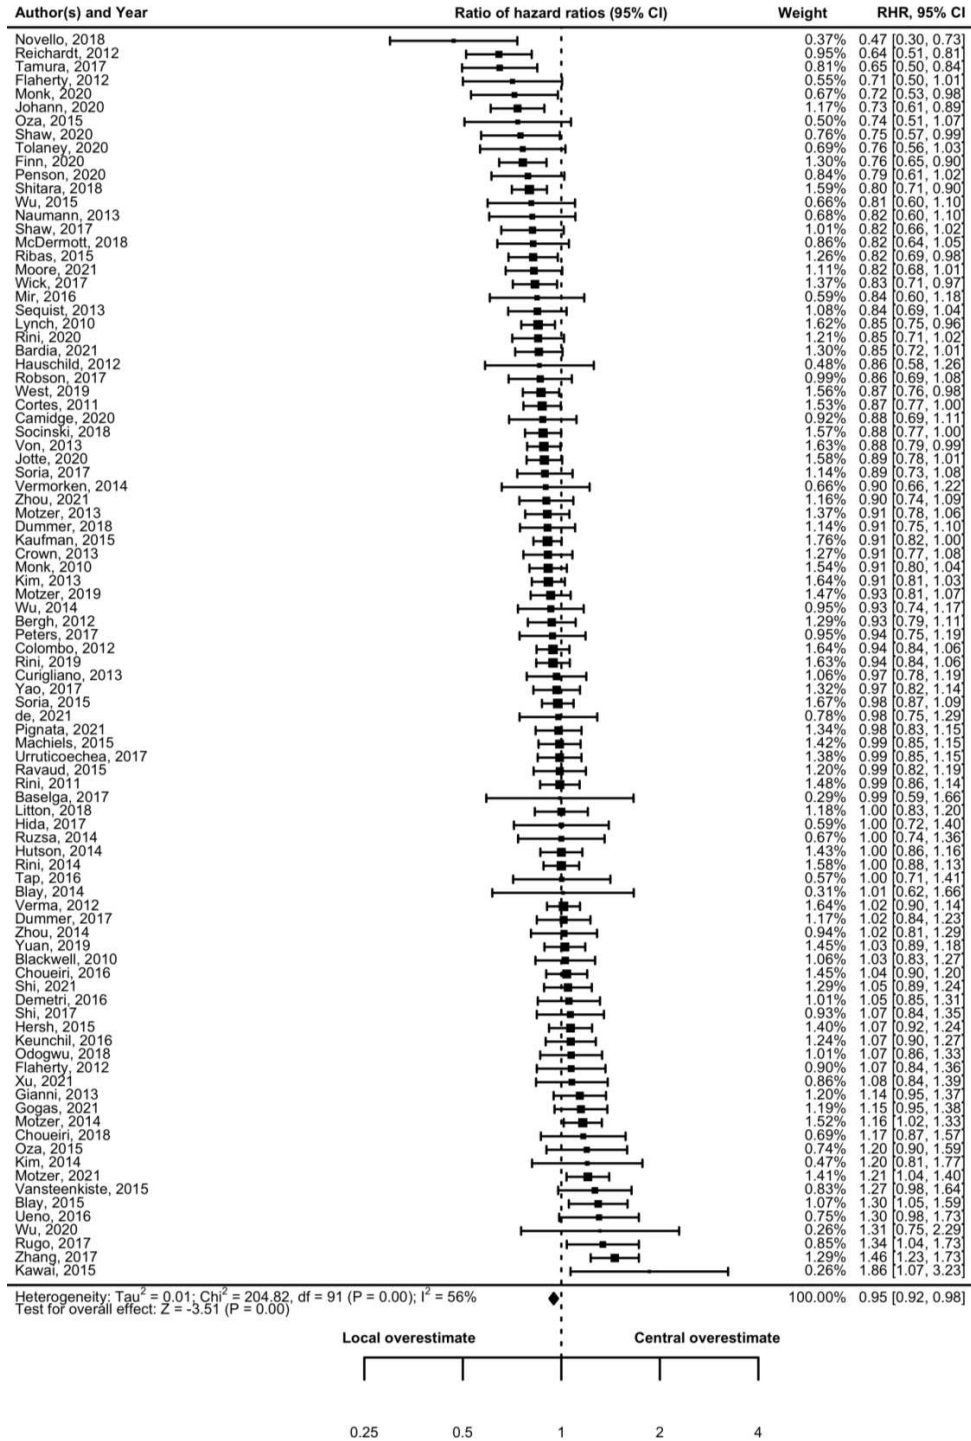



**Supplementary Figure 4d. Comparison of treatment effect estimates (Hazard Ratio) between central reviewers and local investigators. Sensitivity analysis ( $\rho = 0.95$ ).**

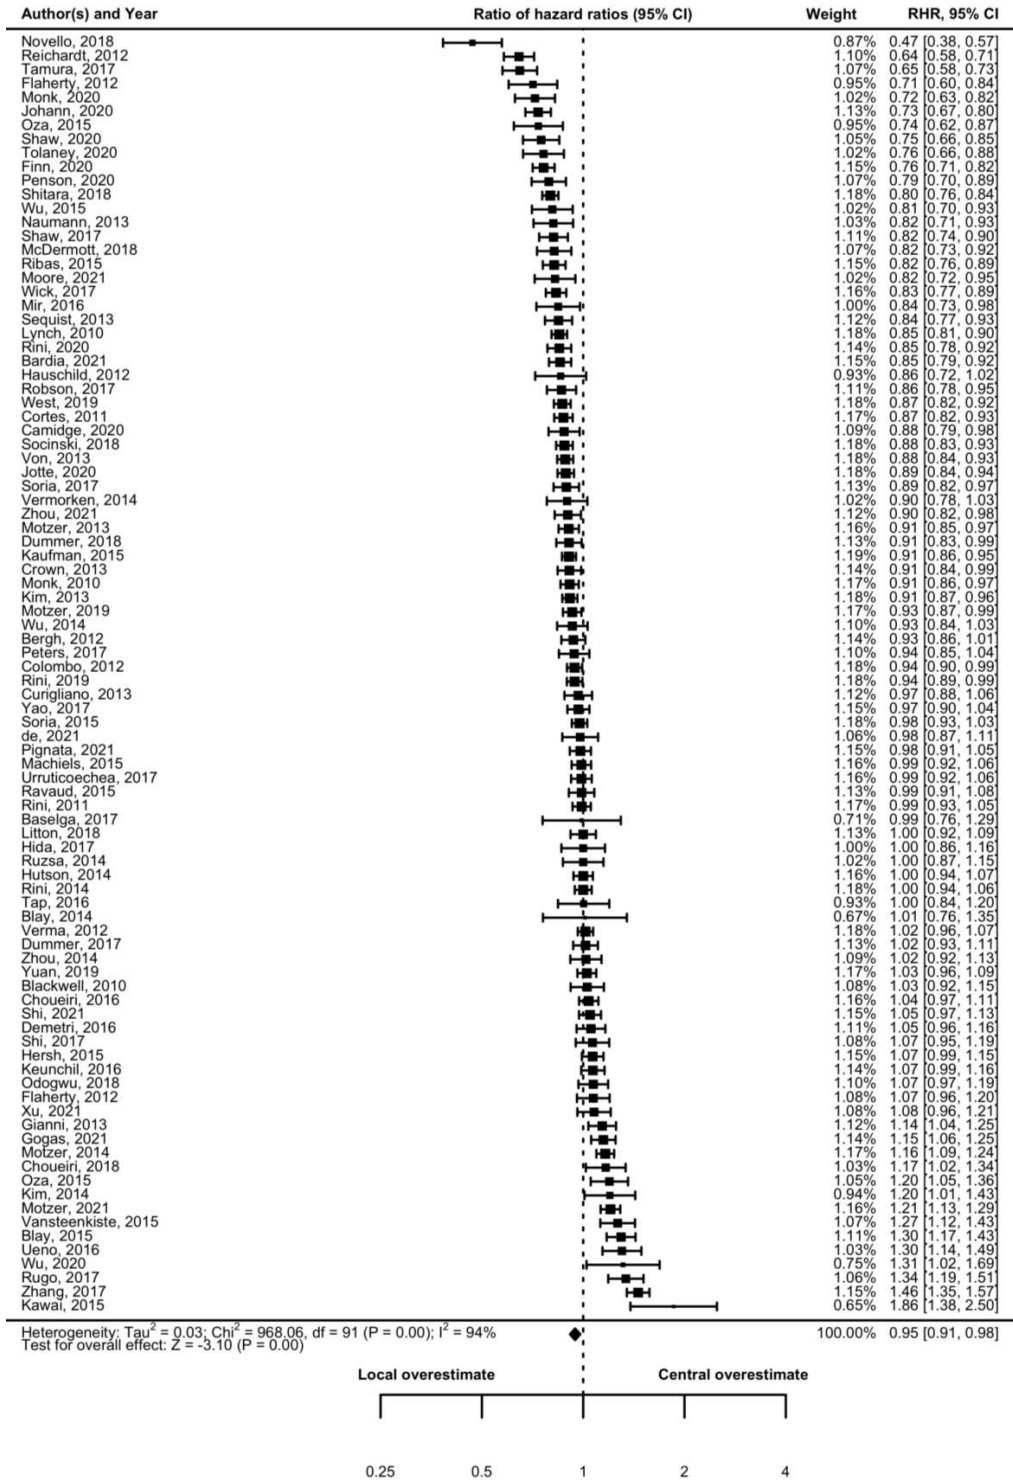

**Supplementary Figure 5a. Comparison of treatment effect estimates (Odds Ratio) between central reviewers and local investigators. Sensitivity analysis ( $\rho = 0.25$ ).**

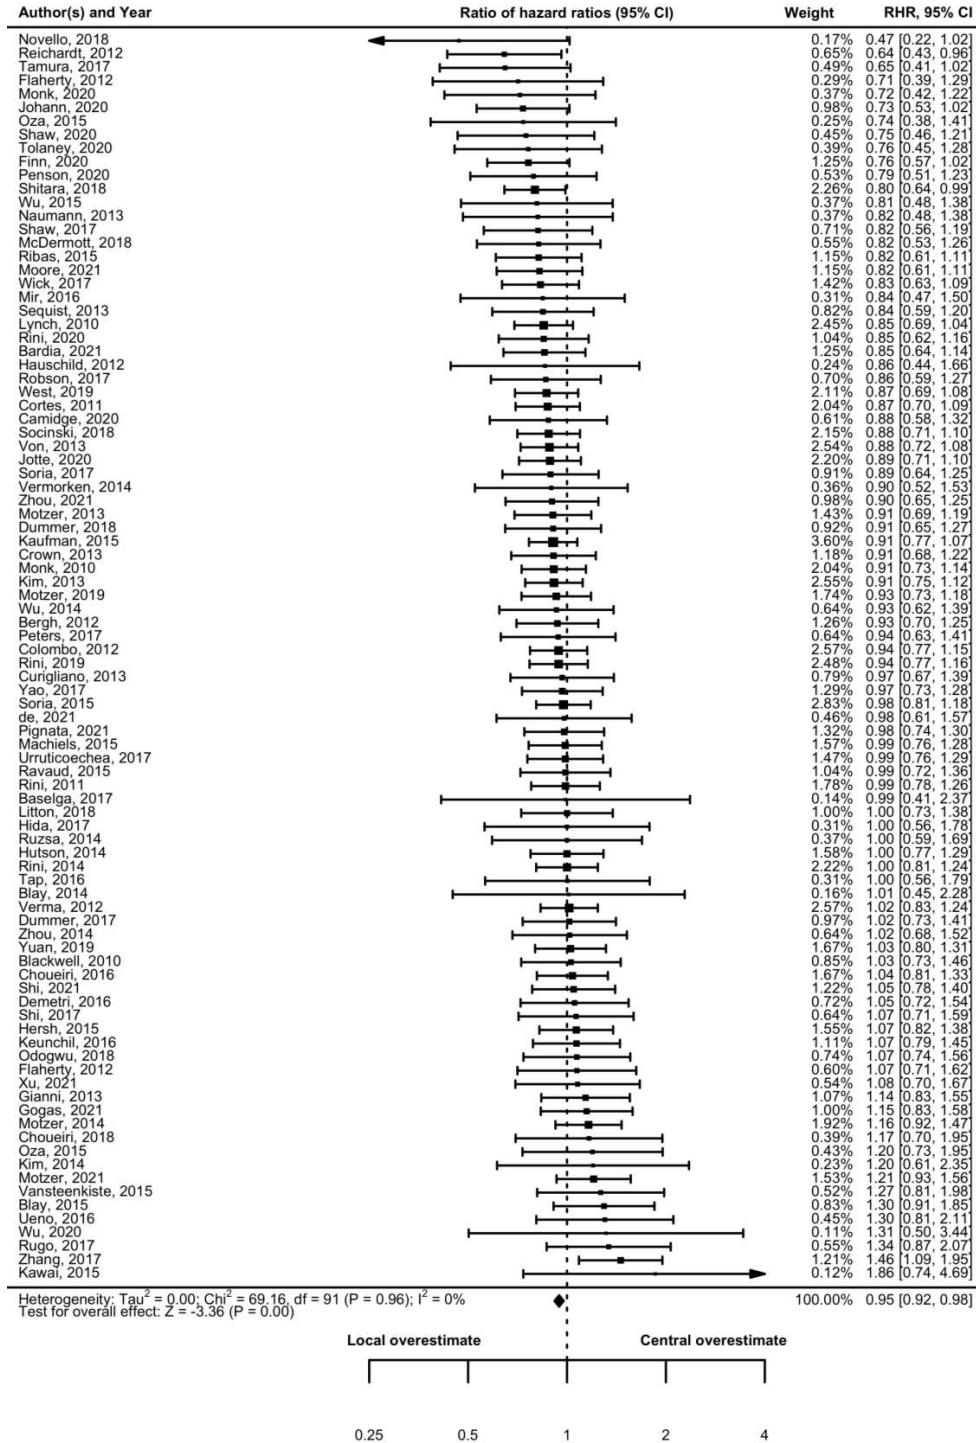



**Supplementary Figure 5b. Comparison of treatment effect estimates (Odds Ratio) between central reviewers and local investigators. Sensitivity analysis ( $\rho = 0.50$ ).**

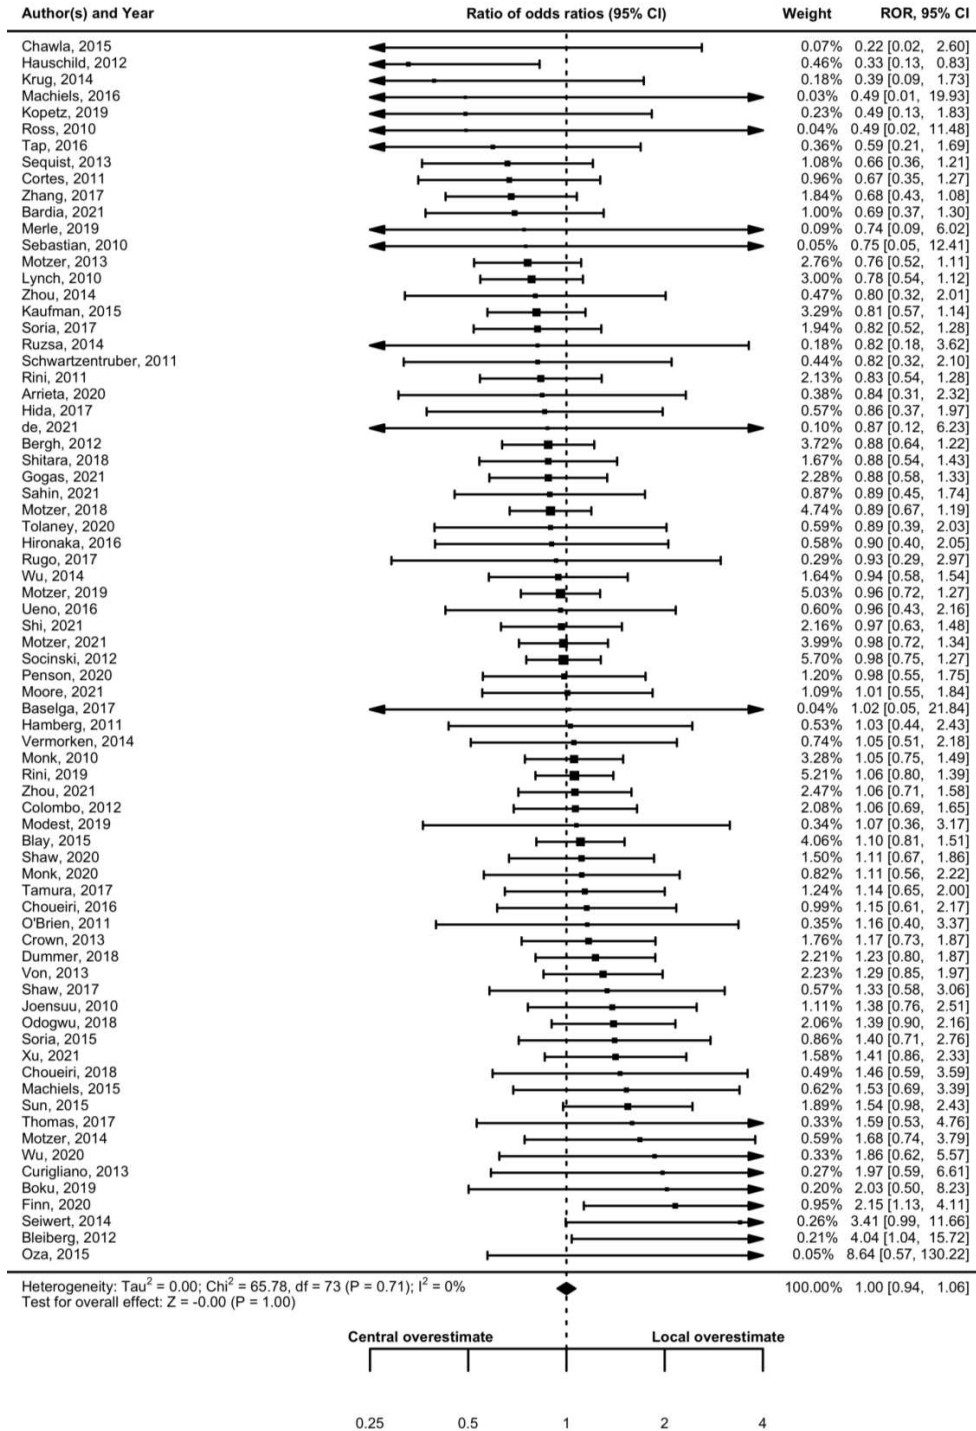

**Supplementary Figure 5c. Comparison of treatment effect estimates (Odds Ratio) between central reviewers and local investigators. Sensitivity analysis ( $\rho = 0.75$ ).**

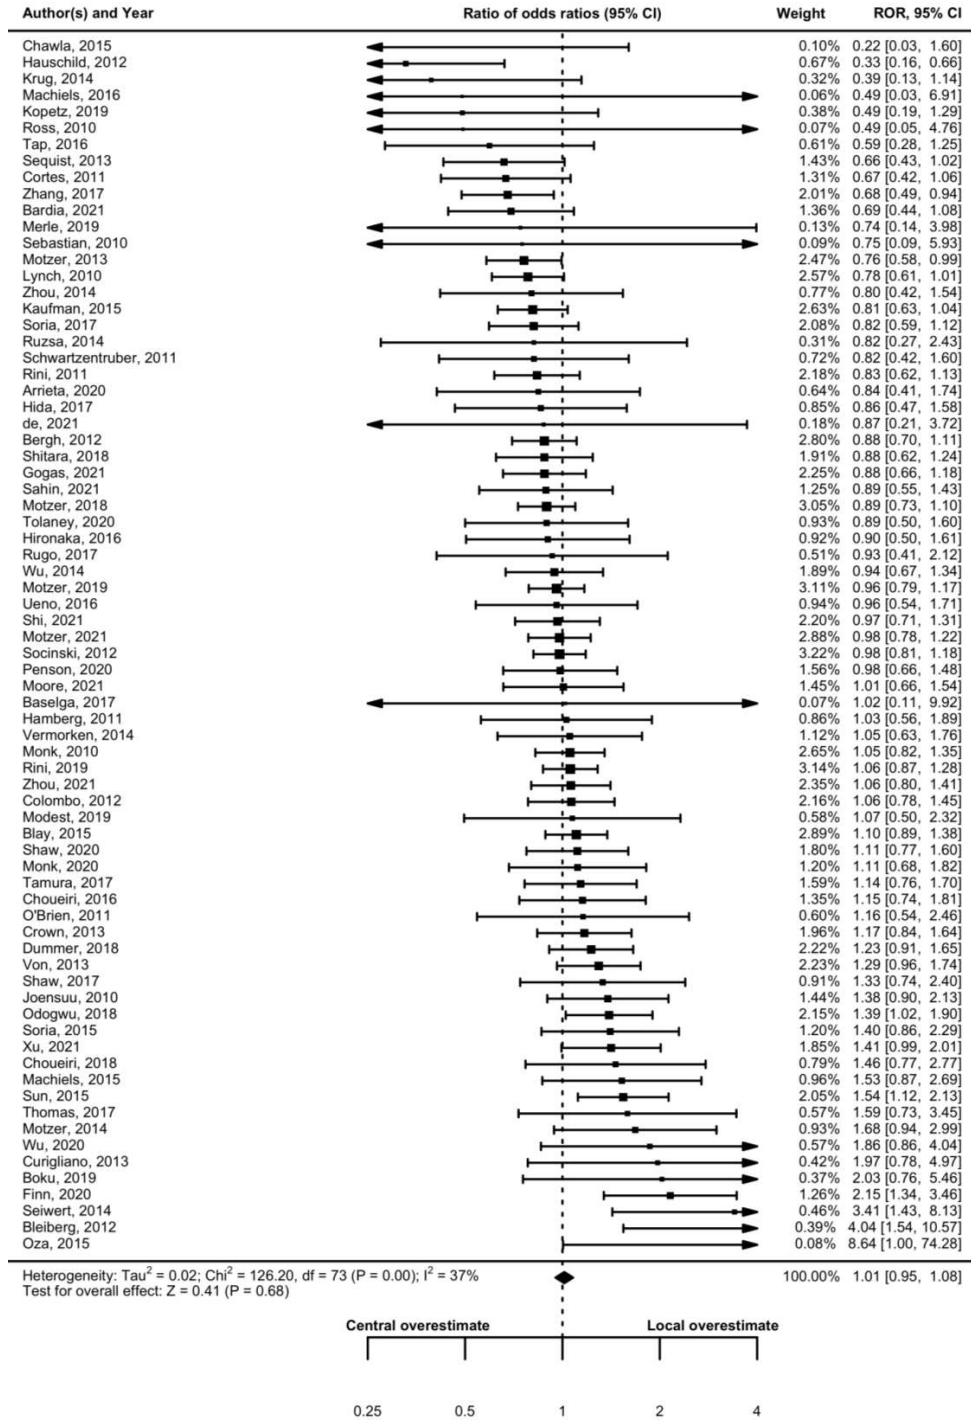

**Supplementary Figure 5d. Comparison of treatment effect estimates (Odds Ratio) between central reviewers and local investigators. Sensitivity analysis ( $\rho = 0.95$ ).**

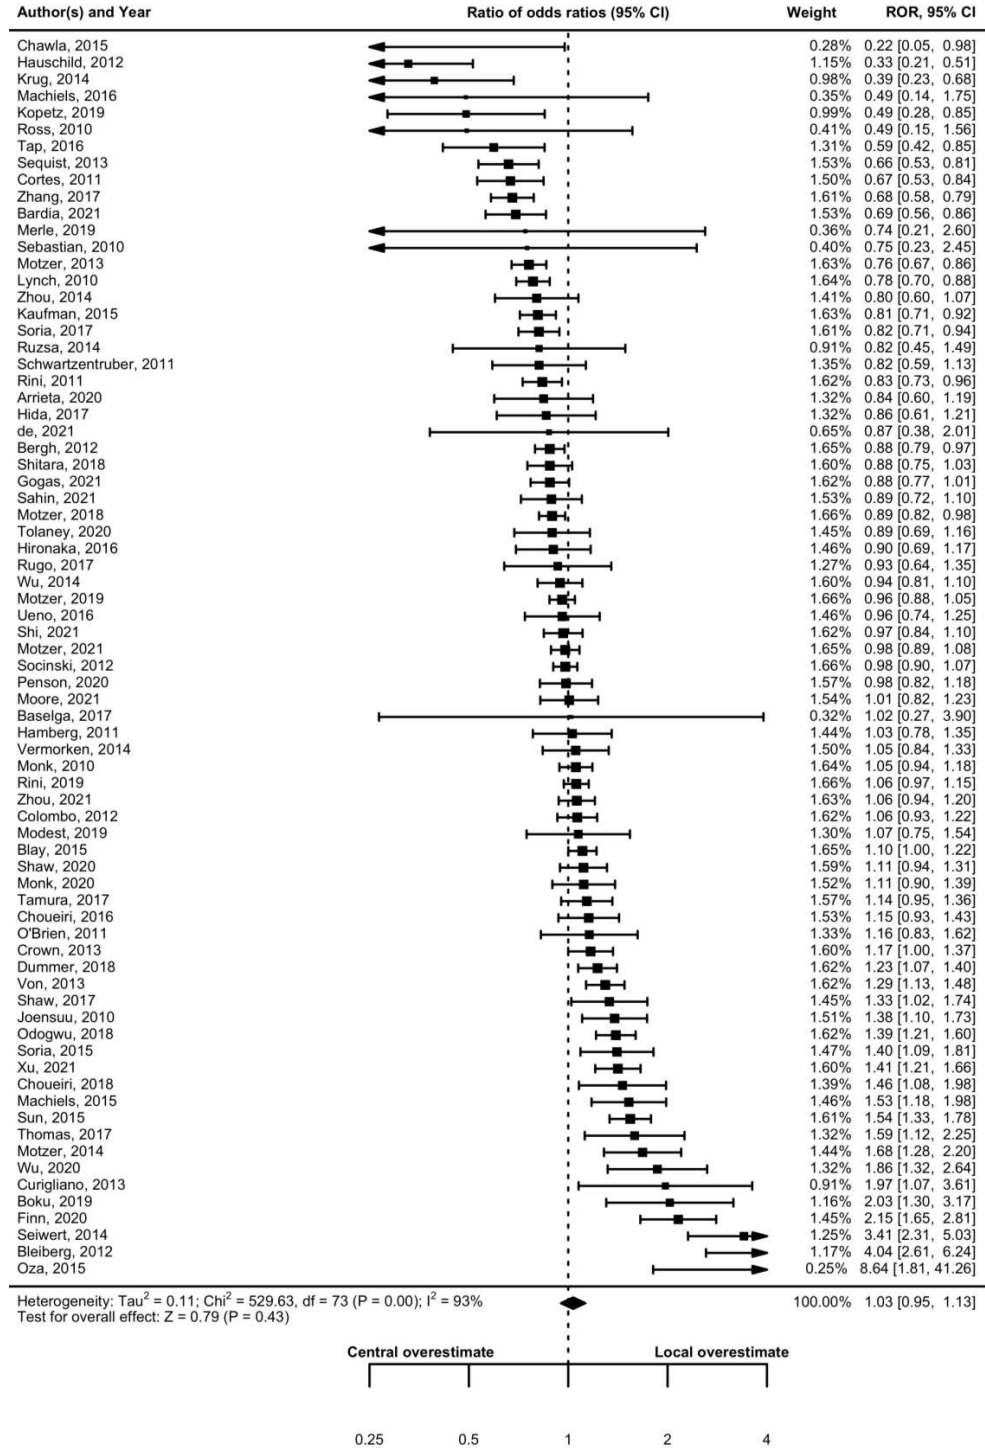

**Supplementary Figure 6a. Comparison of treatment effect estimates (Hazard Ratio) between central reviewers and local investigators. Subgroup analysis: trial phase.**

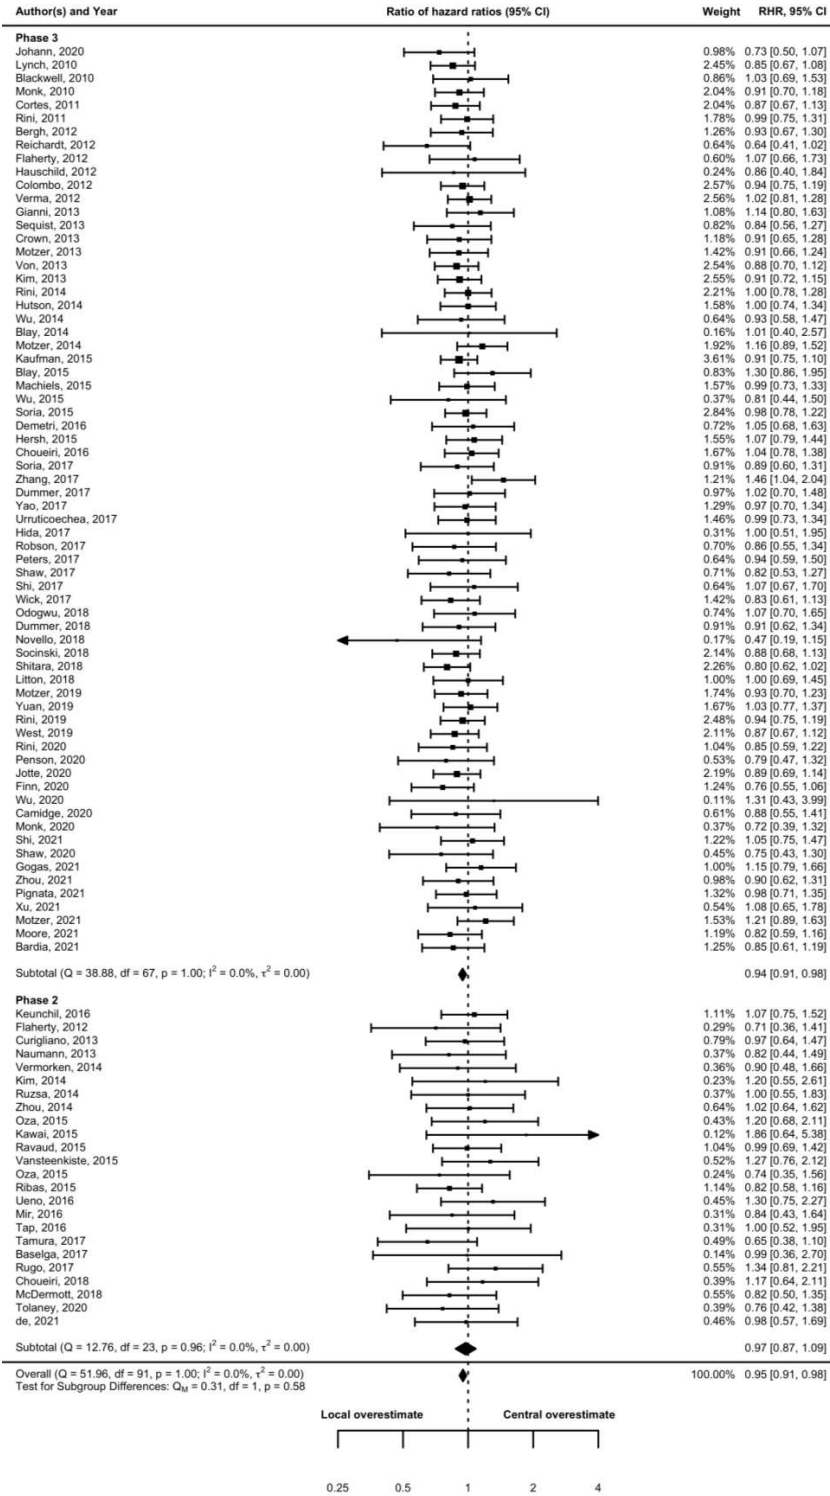



**Supplementary Figure 6b. Comparison of treatment effect estimates (Odds Ratio) between central reviewers and local investigators. Subgroup analysis: trial phase.**

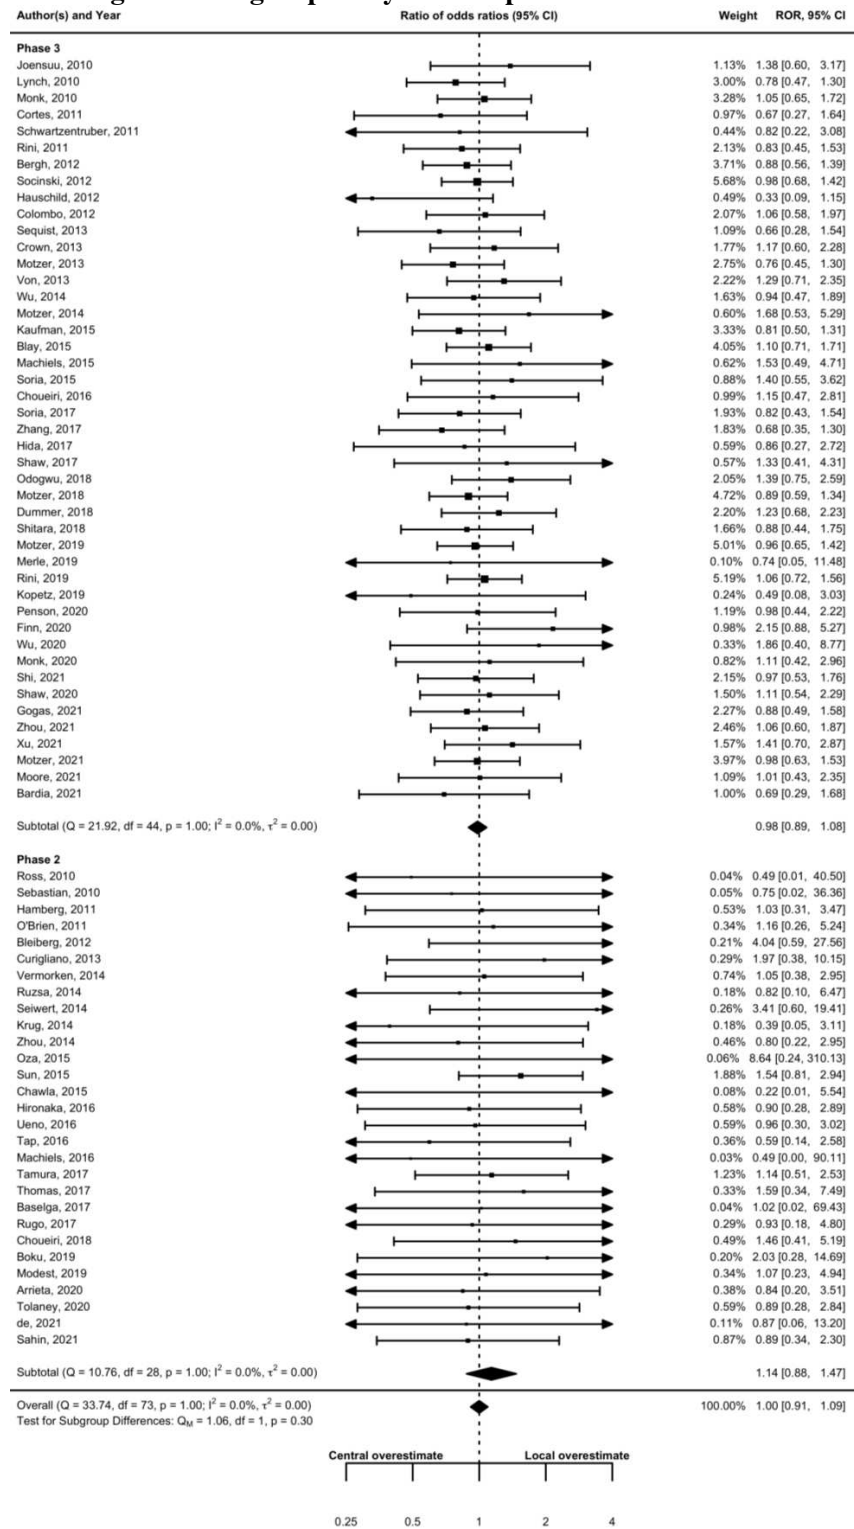

**Supplementary Figure 7a. Comparison of treatment effect estimates (Hazard Ratio) between central reviewers and local investigators. Subgroup analysis: cancer type.**

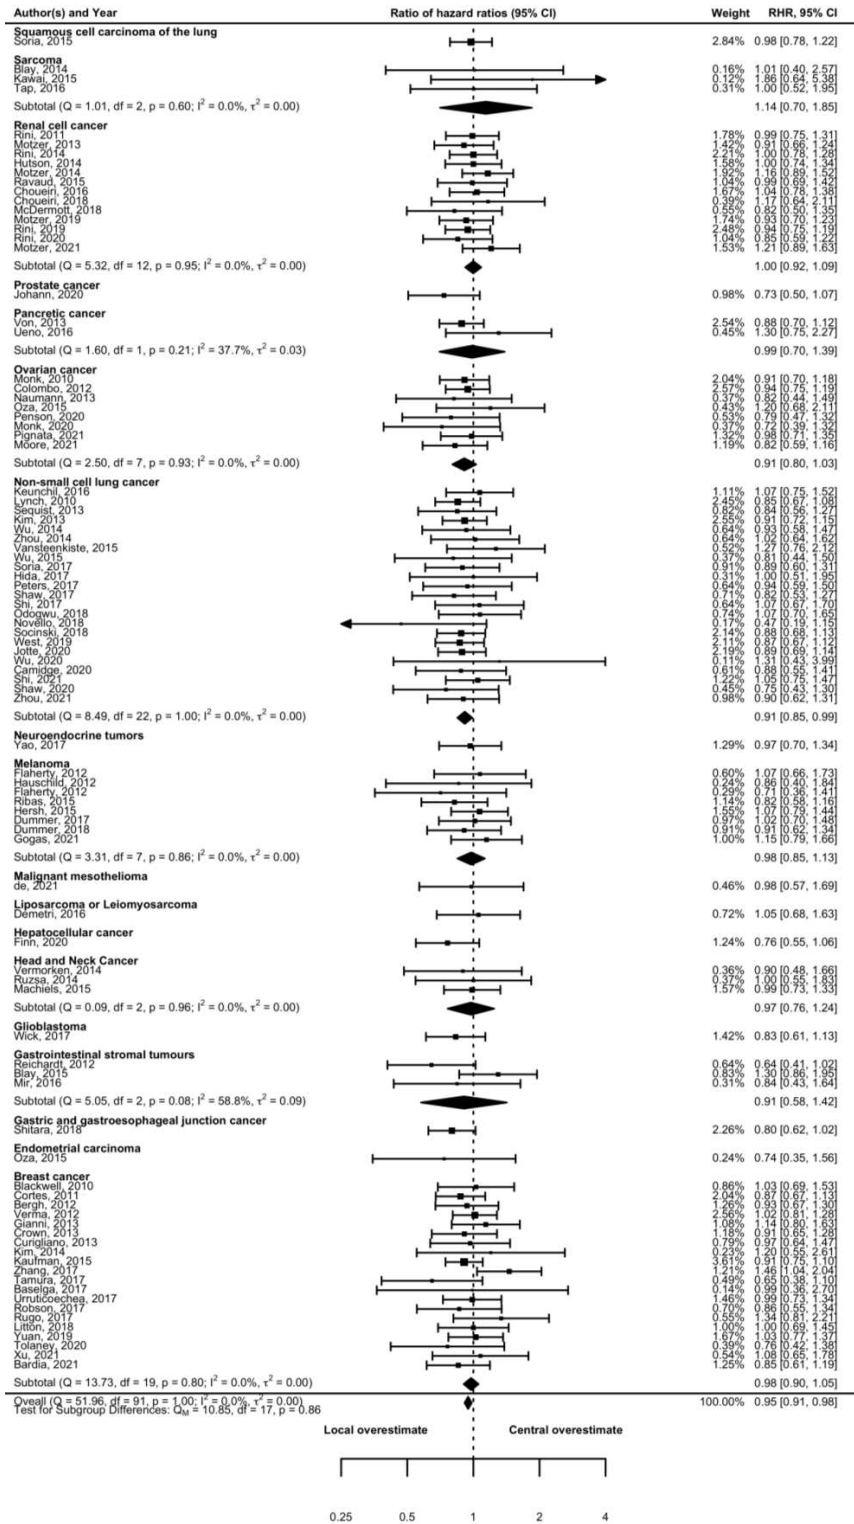



**Supplementary Figure 7b. Comparison of treatment effect estimates (Odds Ratio) between central reviewers and local investigators. Subgroup analysis: cancer type.**

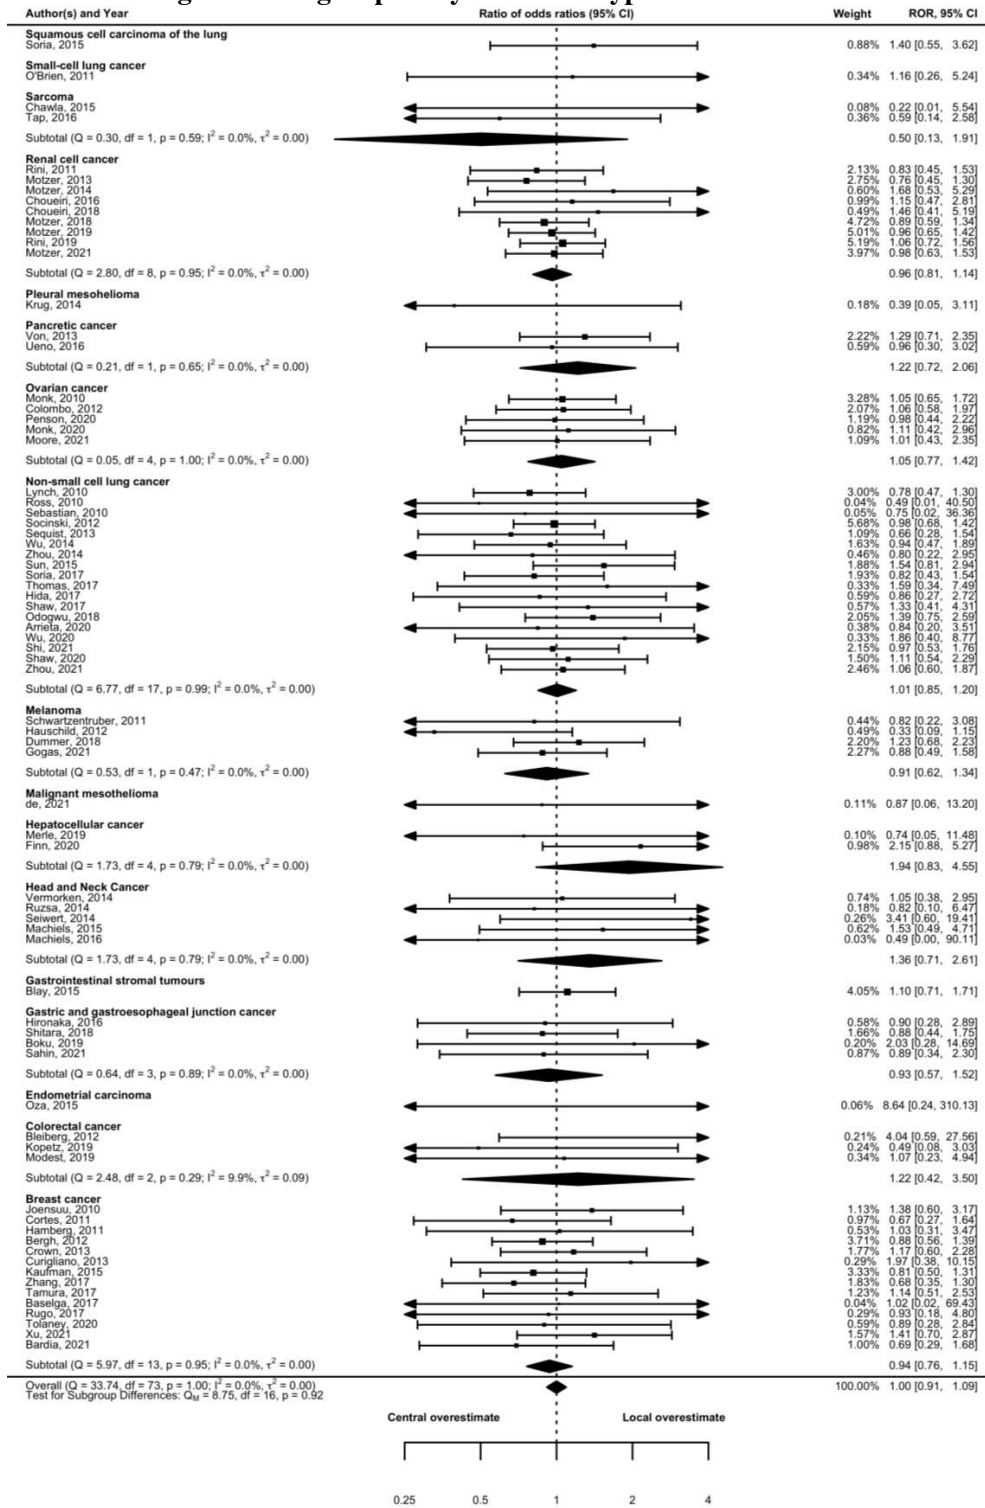

**Supplementary Figure 8a. Comparison of treatment effect estimates (Hazard Ratio) between central reviewers and local investigators. Subgroup analysis: drug classification.**

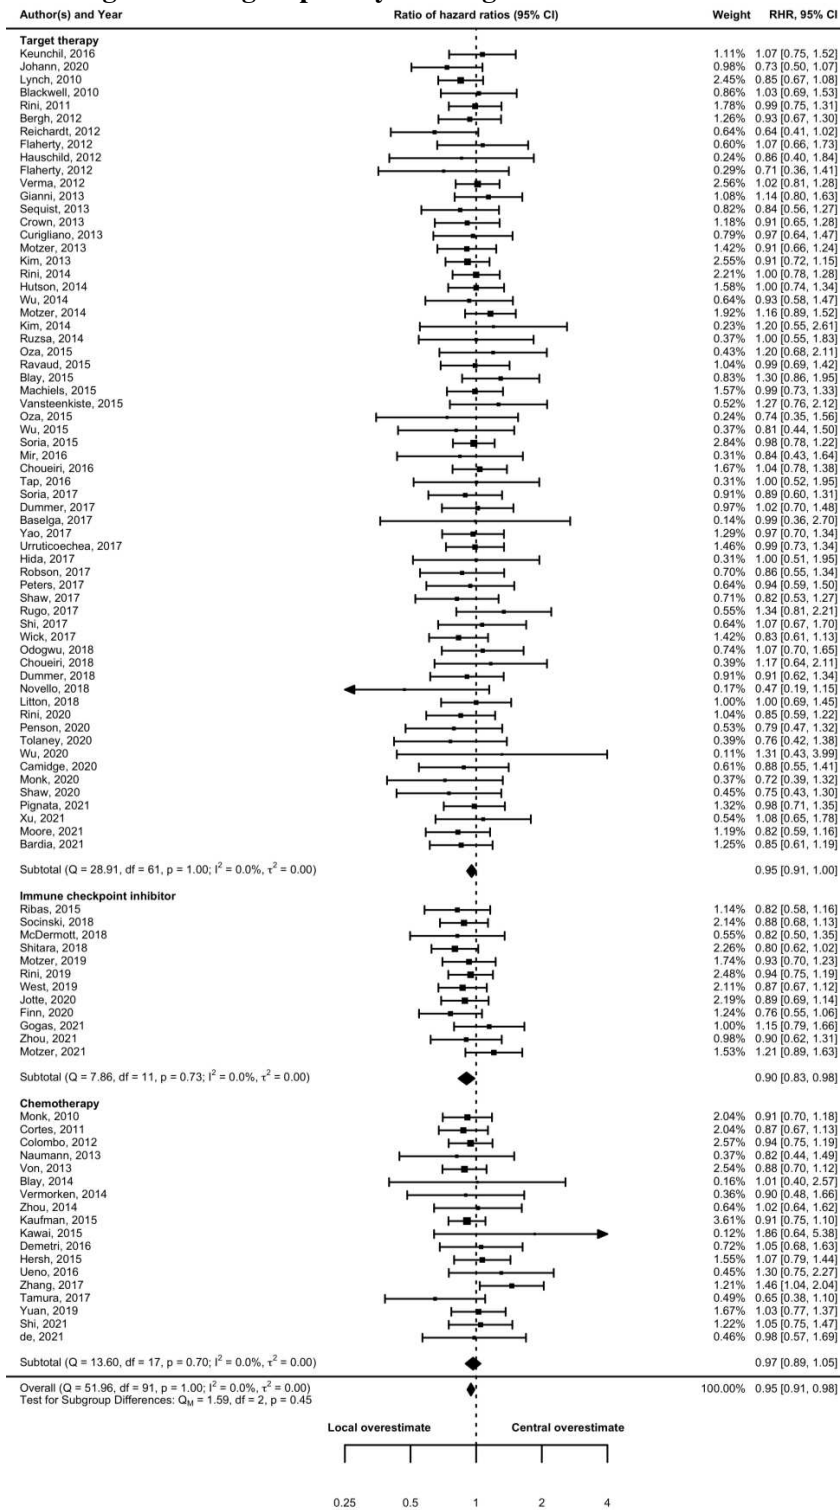

**Supplementary Figure 8b. Comparison of treatment effect estimates (Odds Ratio) between central reviewers and local investigators. Subgroup analysis: drug classification.**

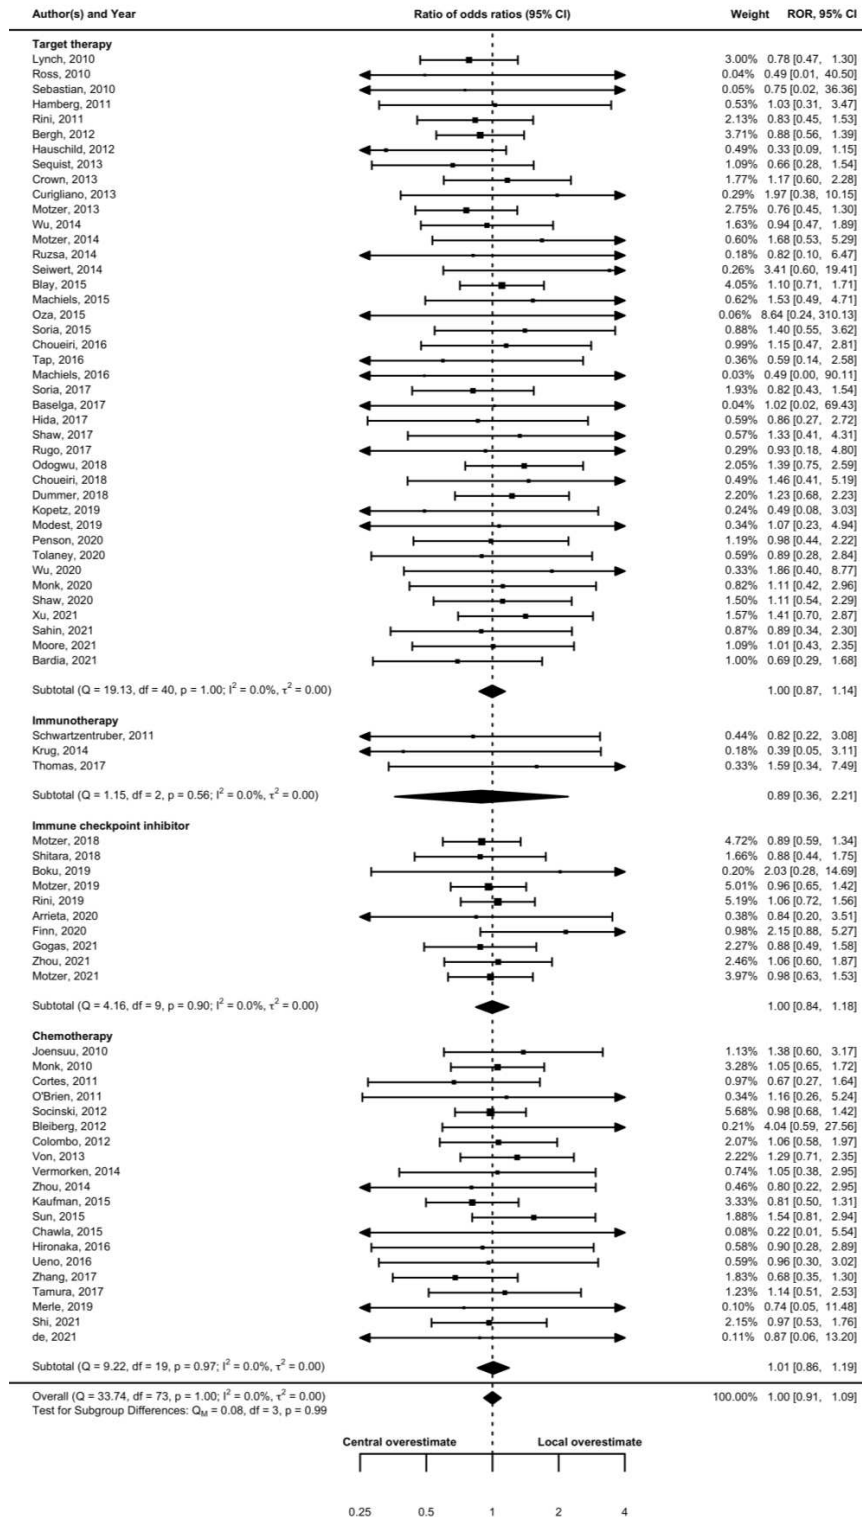

Supplementary Table 1. Adjudicators of open-label trials of anticancer drugs (n = 1,197)

---

|                 |            |
|-----------------|------------|
| PFS             |            |
| Central + local | 157 (13.1) |
| Only central    | 134 (11.2) |
| Only local      | 291 (24.3) |
| Unclear         | 528 (44.1) |
| No PFS          | 87 (7.3)   |
|                 |            |
| ORR             |            |
| Central + local | 141 (11.8) |
| Only central    | 158 (13.2) |
| Only local      | 301 (25.2) |
| Unclear         | 536 (44.8) |
| No ORR          | 61 (5.1)   |

---

Abbreviations: ORR, objective response rate; PFS, progression-free survival.

Supplementary Table 2. Effect of correlation between central and local adjudications (sensitivity analysis).

| PFS    |                     |                  |                |                           |  |
|--------|---------------------|------------------|----------------|---------------------------|--|
| $\rho$ | RHR (95%CI)         | Tau <sup>2</sup> | I <sup>2</sup> | P value for heterogeneity |  |
| 0      | 0.95 (0.91 to 0.98) | 0.00             | 0%             | >0.99                     |  |
| 0.25   | 0.95 (0.92 to 0.98) | 0.00             | 0%             | 0.96                      |  |
| 0.50   | 0.95 (0.92 to 0.97) | 0.00             | 7.0%           | 0.18                      |  |
| 0.75   | 0.95 (0.92 to 0.98) | 0.01             | 56.0%          | < .0001                   |  |
| 0.95   | 0.95 (0.91 to 0.98) | 0.03             | 94.0%          | < .0001                   |  |
| ORR    |                     |                  |                |                           |  |
| $\rho$ | ROR (95%CI)         | Tau <sup>2</sup> | I <sup>2</sup> | P value for heterogeneity |  |
| 0      | 1.00 (0.91 to 1.09) | 0.00             | 0%             | >0.99                     |  |
| 0.25   | 1.00 (0.93 to 1.08) | 0.00             | 0%             | >0.99                     |  |
| 0.50   | 1.00 (0.94 to 1.06) | 0.00             | 0%             | 0.71                      |  |
| 0.75   | 1.01 (0.95 to 1.08) | 0.02             | 37.0%          | < .0001                   |  |
| 0.95   | 1.03 (0.95 to 1.13) | 0.11             | 93.0%          | < .0001                   |  |

Abbreviations: ORR, objective response rate; PFS, progression-free survival; RHR, ratios of hazard ratio; ROR, ratios of odds ratio.

A  $\rho$  is correlation coefficients between central and local adjudications in each trial.

A  $\rho$  of 0 indicates no dependency and a  $\rho$  of 0.95 indicates almost complete dependency.
